# Supplementary material
Source: PubMed Central journal article supplement (PMC3716004)

Supplementary Material

**Using DNase digestion data to accurately identify  
transcription factor binding sites**

KAIXUAN LUO<sup>1</sup> and ALEXANDER J. HARTEMINK<sup>1,2</sup>

<sup>1</sup>Program in Computational Biology and Bioinformatics,  
<sup>2</sup>Department of Computer Science,  
Duke University, Durham, NC 27708, USA

E-mail: [kaixuan.luo@duke.edu](mailto:kaixuan.luo@duke.edu), [amink@cs.duke.edu](mailto:amink@cs.duke.edu)

**Supplement Table 1. Average model performance in 20 yeast and six human TFs using MILLIPEDE gold standard.**

Each row refers to a different method. Columns are auROC, auPR, sensitivity at 1% FPR, precision at 1% FPR in yeast and human.

| Models                  | Yeast TF mean |          |           |           | Human TF mean |          |           |           |
|-------------------------|---------------|----------|-----------|-----------|---------------|----------|-----------|-----------|
|                         | auROC (%)     | auPR (%) | Sens. (%) | Prec. (%) | auROC (%)     | auPR (%) | Sens. (%) | Prec. (%) |
| M24                     | NA            | NA       | NA        | NA        | 97.4          | 57.0     | 63.9      | 50.4      |
| M12                     | 93.4          | 28.1     | 33.3      | 31.5      | 97.8          | 57.2     | 64.6      | 50.6      |
| M11                     | 93.4          | 28.2     | 33.4      | 31.6      | 97.8          | 57.2     | 61.8      | 50.5      |
| M5                      | 94.2          | 29.1     | 34.5      | 32.6      | 97.6          | 56.1     | 61.5      | 50.3      |
| M3                      | 93.8          | 28.3     | 33.0      | 32.1      | 97.6          | 55.6     | 58.8      | 50.0      |
| M2                      | 93.8          | 27.4     | 32.2      | 31.4      | 97.6          | 55.0     | 59.1      | 50.2      |
| M1                      | 93.9          | 27.5     | 32.4      | 31.5      | 97.6          | 55.0     | 59.0      | 50.1      |
| M1 w/o PWM              | 88.9          | 12.3     | 10.5      | 12.2      | 96.3          | 50.0     | 45.4      | 46.6      |
| PWM only                | 86.2          | 16.7     | 16.5      | 22.1      | 71.2          | 24.3     | 14.1      | 31.4      |
| CENTIPEDE w/ shrinkage  | 73.6          | 12.8     | 14.2      | 16.4      | 97.3          | 48.3     | 51.2      | 47.7      |
| CENTIPEDE w/o shrinkage | 55.3          | 11.3     | 15.4      | 15.0      | 94.3          | 49.0     | 57.0      | 49.2      |

**Supplement Table 2. Average model performance in six human TFs using MILLIPEDE and CENTIPEDE gold standard.**

Each row refers to a different method. Columns are auROC, auPRC, sensitivity at 1% FPR, precision at 1% FPR using MILLIPEDE and CENTIPEDE gold standard.

| Models                  | MILLIPEDE gold standard |          |           |           | CENTIPEDE gold standard |          |           |           |
|-------------------------|-------------------------|----------|-----------|-----------|-------------------------|----------|-----------|-----------|
|                         | auROC (%)               | auPR (%) | Sens. (%) | Prec. (%) | auROC (%)               | auPR (%) | Sens. (%) | Prec. (%) |
| M24                     | 97.4                    | 57.0     | 63.9      | 50.4      | 98.4                    | 73.8     | 80.4      | 60.4      |
| M12                     | 97.8                    | 57.2     | 64.6      | 50.6      | 98.8                    | 75.2     | 84.7      | 60.9      |
| M11                     | 97.8                    | 57.2     | 61.8      | 50.5      | 98.7                    | 75.1     | 84.3      | 60.7      |
| M5                      | 97.6                    | 56.1     | 61.5      | 50.3      | 98.6                    | 74.1     | 82.2      | 60.8      |
| M3                      | 97.6                    | 55.6     | 58.8      | 50.0      | 98.6                    | 74.0     | 80.0      | 60.8      |
| M2                      | 97.6                    | 55.0     | 59.1      | 50.2      | 98.6                    | 73.9     | 80.8      | 60.8      |
| M1                      | 97.6                    | 55.0     | 59.0      | 50.1      | 98.6                    | 73.8     | 80.3      | 60.8      |
| M1 w/o PWM              | 96.3                    | 50.0     | 45.4      | 46.6      | 97.1                    | 70.4     | 72.2      | 59.3      |
| PWM only                | 71.2                    | 24.3     | 14.1      | 31.4      | 73.0                    | 30.5     | 19.2      | 35.1      |
| CENTIPEDE w/ shrinkage  | 97.3                    | 48.3     | 51.2      | 47.7      | 98.0                    | 69.8     | 81.8      | 60.2      |
| CENTIPEDE w/o shrinkage | 94.3                    | 49.0     | 57.0      | 49.2      | 86.5                    | 60.6     | 68.7      | 55.2      |

**Supplement Figure 1. Area under the ROC curve for 20 yeast and six human TFs.**

Red bars are MILLIPEDE model M5 run in a supervised mode, magenta bars are M2 run in a partially unsupervised mode (trained by Reb1 in yeast, or REST in human), orange bars are M2 run in a completely unsupervised mode, blue bars are CENTIPEDE with shrinkage, cyan bars are CENTIPEDE without shrinkage. Bars start at 50% since that represents random performance for an ROC curve; values below 50 are just not shown. The 20 yeast TFs are listed before the six human TFs; within each organism, the TFs are sorted such that the red bars decrease in height.

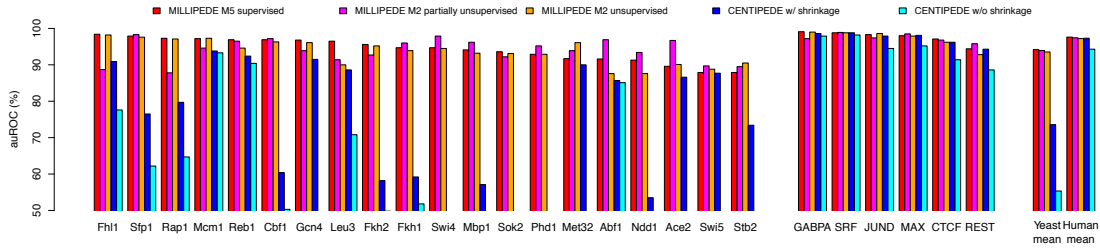

**Supplement Figure 2. DNase digestion data for Swi4 candidate binding sites in yeast.**

DNase data can exhibit systematic artifacts such as sequence-dependent digestion bias. The figure shows the digestion patterns for Swi4 candidate binding sites, whose consensus binding sequence is CGCGAAA.

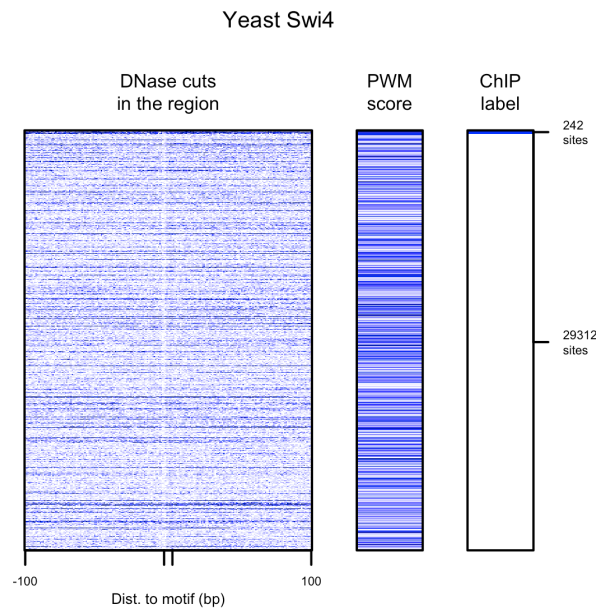

Supplement: NIHMS441926-supplement-Arrays.pdf [file NIHMS441926-supplement-Arrays.pdf]
